# Supplementary material for: Additive Manufacturing of Carbon Fiber-Reinforced Thermoset Composites via In-Situ Thermal Curing
Source: Research Square preprint supplement (doi:10.21203/rs.3.rs-3397066/v1), 2023-10-02
Supplement: Supplementary file 1 [file fef2f8e649a09cd6b4189e39.docx]

Supporting Information

*for*

Additive Manufacturing of Carbon Fiber-Reinforced Thermoset Composites via *In-Situ* ThermalCuring

Carter F. Dojan, Morteza Ziaee, Samuel J. Radosevich, and Mostafa Yourdkhani*

* Corresponding author. Email: yourd@colostate.edu


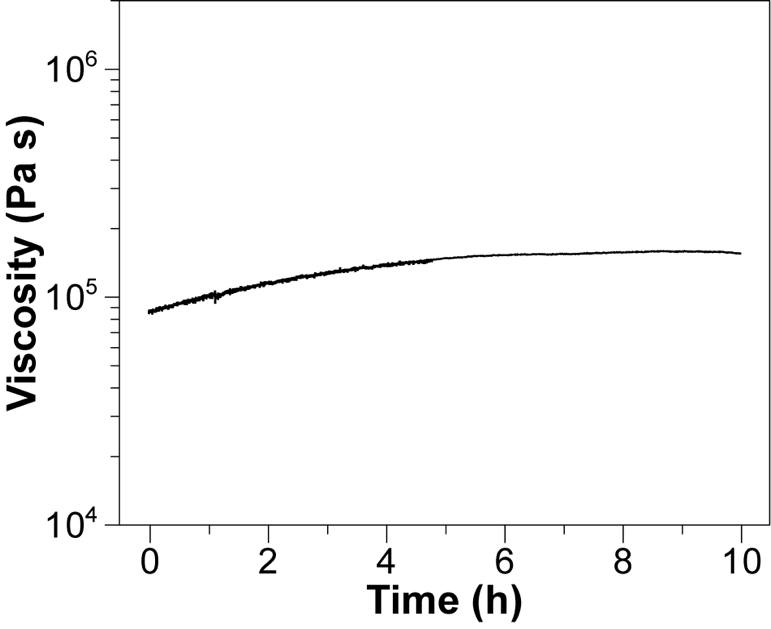


**Fig. S1.** Rheological behavior of the composite ink containing 15 vol% of discontinuous carbon fibers at -5 °C, showing the relative stable viscosity of the ink during the printing process.


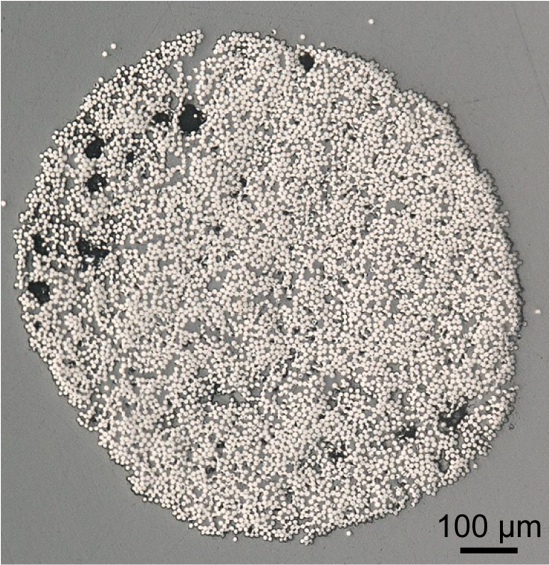


**Fig. S2.** Optical micrograph from the cross-section of a composite filament with 55.5 vol% of continuous carbon fibers and 1.5 vol% void content.


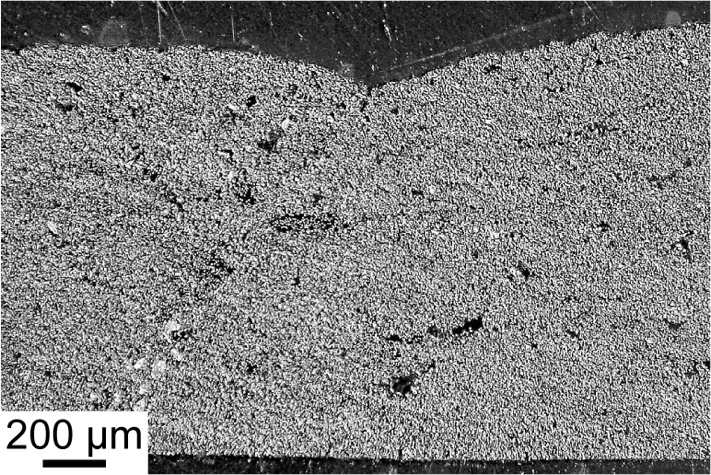


**Fig. S3.** Optical micrograph from the cross-section of a multilayer composite part, showing the region between two adjacent horizontal print path and a stack of three print layers.
